# Supplementary material
Source: publisher figshare collection journal article supplement (https://gsajournals.figshare.com/ndownloader/files/14332817)
Supplement: Supplementary file 1 [file 14332817]

## Sheet: Table S1
Table S1: No. of SNPs distributed across the IWG genome (21 chromosomes). Physical length of the chromosomes are shown in base pairs (based on v2.1 reference genome). The no. of QTL detected in each chromosome is correlated with a) no. of SNPs in the respective chromosome, and b) the length of the respective chromosome.
Chromosome	No. of SNPs	Length (bp)	QTL detected		correl(SNPs,QTL)
1	431	507504168	5		0.54
2	508	437676719	10
3	335	513977014	7		correl(dist,QTL)
4	420	267517694	12		-0.07
5	283	435846489	3
6	466	570865161	9
7	418	522225096	6
8	496	432639479	5
9	333	473801514	4
10	294	515727921	6
11	295	250759875	9
12	240	436383124	2
13	517	387897695	15
14	420	524760563	6
15	498	612057120	7
16	350	401185565	8
17	359	337238159	4
18	447	560594649	9
19	567	802639677	8
20	749	676967214	10
21	473	448790355	9
